# Supplementary material for: Identifying significantly impacted pathways: a comprehensive review and assessment
Source: Springer Nature journal article supplement (doi:10.1186/s13059-019-1790-4), 2019-10-09
Supplement: MOESM1 [file 13059_2019_1790_MOESM1_ESM.pdf]

# Identifying significantly impacted pathways: a comprehensive review and assessment (Supplementary Materials)

Tuan-Minh Nguyen

Adib Shafi

Tin Nguyen

Sorin Drăghici

August 7, 2019

## 1 Benchmark Data Sets

Table S1 provides detailed information regarding the 75 human data sets used for benchmarking methods' ability to identify target pathways. This information includes: GEO ID, disease, number of normal samples and phenotype samples, Pubmed ID, tissue from which the samples were taken, and the platform used for the experiment.

Table S2 provides detailed information regarding the 11 benchmark KO data sets used. This information includes: the GEO ID, symbol of KO gene, number of truly impacted pathways, number of normal samples, number of phenotype samples, Pubmed ID, tissue from which the samples were taken, and the platform used for the experiment.

All data sets were downloaded from Gene Expression Omnibus database. We normalized them using RMA background adjustment, quantile normalization, and median polish summarization. We used the *threestep* function from *affyPLM* package to perform those steps. Subsequently, standard genome wide annotation packages corresponding to the platform, e.g. hgu133a.db for HG-U133A, were used to map probes to genes. In case there are multiple probes mapped to the same gene, the median value is chosen.

Table S1: 75 benchmark data sets of 15 diseases used to compare 11 methods in this paper.

| GEO ID       | Disease                | #Normal | #Condition | Pubmed ID | Tissue                                 | Platform         |
|--------------|------------------------|---------|------------|-----------|----------------------------------------|------------------|
| GSE781       | Renal cell carcinoma   | 5       | 12         | 14641932  | Kidney                                 | HG-U133A         |
| GSE14762     | Renal cell carcinoma   | 12      | 9          | 19252501  | Kidney                                 | HG-U133 Plus 2.0 |
| GSE6357      | Renal cell carcinoma   | 12      | 6          | 27063186  | CD8+ T Cell                            | HG-U133A         |
| GSE6344      | Renal cell carcinoma   | 10      | 10         | 17699851  | Clear cell RCC                         | HG-U133A         |
| GSE48352     | Renal cell carcinoma   | 8       | 24         | NA        | Kidney                                 | HG-U133 Plus 2.0 |
| GSE1297      | Alzheimer's disease    | 9       | 7          | 14769913  | Hippocampal CA1                        | HG-U133A         |
| GSE5281EC    | Alzheimer's disease    | 13      | 10         | 17077275  | Brain, Entorhinal Cortex               | HG-U133 Plus 2.0 |
| GSE5281HIP   | Alzheimer's disease    | 13      | 10         | 17077275  | Brain, hippocampus                     | HG-U133 Plus 2.0 |
| GSE5281VCX   | Alzheimer's disease    | 12      | 19         | 17077275  | Brain, primary visual cortex           | HG-U133 Plus 2.0 |
| GSE16759     | Alzheimer's disease    | 8       | 4          | 20126538  | Parietal lobe                          | HG-U133 Plus 2.0 |
| GSE3467      | Thyroid cancer         | 9       | 9          | 16365291  | Thyroid                                | HG-U133 Plus 2.0 |
| GSE3678      | Thyroid cancer         | 7       | 7          | NA        | Thyroid                                | HG-U133 Plus 2.0 |
| GSE58545     | Thyroid cancer         | 18      | 27         | 26625260  | Thyroid                                | HG-U133A         |
| GSE85457     | Thyroid cancer         | 3       | 4          | NA        | Thyroid                                | HG-U133 Plus 2.0 |
| GSE58689     | Thyroid cancer         | 18      | 27         | 26625260  | Thyroid                                | HG-U133A         |
| GSE3585      | Dilated cardiomyopathy | 5       | 7          | 17045896  | Heart, subendocardial left ventricular | HG-U133A         |
| GSE33970     | Dilated cardiomyopathy | 18      | 5          | NA        | Whole blood and heart                  | HG-U133 Plus 2.0 |
| GSE29819     | Dilated cardiomyopathy | 12      | 14         | 22085907  | Heart, left and right ventricular      | HG-U133 Plus 2.0 |
| GSE79962     | Dilated cardiomyopathy | 11      | 9          | NA        | Heart                                  | HuGene-10st      |
| GSE21610     | Dilated cardiomyopathy | 8       | 42         | 20460602  | Heart                                  | HG-U133 Plus 2.0 |
| GSE4107      | Colorectal cancer      | 10      | 12         | 17317818  | Colonic mucosa                         | HG-U133 Plus 2.0 |
| GSE8671      | Colorectal cancer      | 32      | 32         | 18171984  | Colon                                  | HG-U133 Plus 2.0 |
| GSE9348      | Colorectal cancer      | 12      | 70         | 20143136  | Colon                                  | HG-U133 Plus 2.0 |
| GSE23878     | Colorectal cancer      | 19      | 19         | 21281787  | Colon                                  | HG-U133 Plus 2.0 |
| GSE4183      | Colorectal cancer      | 8       | 15         | 18776587  | Colon                                  | HG-U133 Plus 2.0 |
| GSE6956C     | Prostate cancer        | 11      | 36         | 18245496  | Prostate                               | HG-U133A 2       |
| GSE6956AA    | Prostate cancer        | 7       | 33         | 18245496  | Prostate                               | HG-U133A 2       |
| GSE55945     | Prostate cancer        | 7       | 12         | 19737960  | Prostate                               | HG-U133 Plus 2.0 |
| GSE26910     | Prostate cancer        | 6       | 6          | 21611158  | Prostate                               | HG-U133 Plus 2.0 |
| GSE104749    | Prostate cancer        | 4       | 4          | NA        | Prostate                               | HG-U133 Plus 2.0 |
| GSE8762      | Huntington's disease   | 10      | 12         | 17724341  | Lymphocyte                             | HG-U133 Plus 2.0 |
| GSE24250     | Huntington's disease   | 6       | 8          | 21969577  | Venous cellular whole blood            | HG-U133A         |
| GSE73655     | Huntington's disease   | 7       | 13         | 26756592  | Subcutaneous adipose                   | HuGene-10st      |
| GSE45516     | Huntington's disease   | 3       | 6          | 24296361  | Fibroblasts                            | HG-U133 Plus 2.0 |
| GSE37517     | Huntington's disease   | 5       | 8          | 22748968  | Neural stem cell                       | HuGene-10st      |
| GSE9476      | Acute Myeloid Leukemia | 37      | 26         | 17910043  | Peripheral blood, bone marrow          | HG-U133A         |
| GSE14924.CD4 | Acute Myeloid Leukemia | 10      | 10         | 19710498  | CD4 T Cell                             | HG-U133 Plus 2.0 |
| GSE14924.CD8 | Acute Myeloid Leukemia | 11      | 10         | 19710498  | CD8 T Cell                             | HG-U133 Plus 2.0 |
| GSE92778     | Acute Myeloid Leukemia | 6       | 6          | 29035359  | Bone marrow stroma cells               | HuGene-10st      |

|             |                            |    |     |          |                                         |                  |
|-------------|----------------------------|----|-----|----------|-----------------------------------------|------------------|
| GSE68172    | Acute Myeloid Leukemia     | 5  | 72  | NA       | LSC, HSC and leukemic bulk AML *        | HG-U133 Plus 2.0 |
| GSE15471    | Pancreatic cancer          | 35 | 35  | 19260470 | Pancreas                                | HG-U133 Plus 2.0 |
| GSE16515    | Pancreatic cancer          | 15 | 15  | 19732725 | Pancreas                                | HG-U133 Plus 2.0 |
| GSE32676    | Pancreatic cancer          | 7  | 25  | 22261810 | Pancreas                                | HG-U133 Plus 2.0 |
| GSE28735    | Pancreatic cancer          | 45 | 45  | 23918603 | Pancreas                                | HuGene-10st      |
| GSE18670    | Pancreatic cancer          | 6  | 18  | 23157946 | Pancreas                                | HG-U133 Plus 2.0 |
| GSE18842    | Non-small cell lung cancer | 44 | 44  | 20878980 | Lung                                    | HG-U133 Plus 2.0 |
| GSE19188    | Non-small cell lung cancer | 62 | 91  | 20421987 | Lung                                    | HG-U133 Plus 2.0 |
| GSE19804    | Non-small cell lung cancer | 60 | 60  | 20802022 | Lung                                    | HG-U133 Plus 2.0 |
| GSE50627    | Non-small cell lung cancer | 6  | 9   | 25881239 | Lung                                    | HuGene-10st      |
| GSE6044     | Non-small cell lung cancer | 5  | 31  | 18992152 | Lung                                    | HG-Focus         |
| GSE19728    | Glioma                     | 4  | 17  | 21836821 | Brain                                   | HG-U133 Plus 2.0 |
| GSE21354    | Glioma                     | 4  | 13  | 21836821 | Brain                                   | HG-U133 Plus 2.0 |
| GSE50161    | Glioma                     | 13 | 95  | 24078694 | Brain                                   | HG-U133 Plus 2.0 |
| GSE4290     | Glioma                     | 23 | 157 | 16616334 | Brain                                   | HG-U133 Plus 2.0 |
| GSE44971    | Glioma                     | 9  | 49  | 23660940 | Brain                                   | HG-U133 Plus 2.0 |
| GSE20153    | Parkinson's disease        | 8  | 8   | 20926834 | B lymphocytes from peripheral blood     | HG-U133 Plus 2.0 |
| GSE20291    | Parkinson's disease        | 20 | 15  | 15965975 | Brain                                   | HG-U133A         |
| GSE20164    | Parkinson's disease        | 5  | 6   | 20926834 | Substantia nigra (midbrain)             | HG-U133A         |
| GSE7621     | Parkinson's disease        | 9  | 16  | 17571925 | Substantia nigra (midbrain)             | HG-U133 Plus 2.0 |
| GSE19587    | Parkinson's disease        | 10 | 12  | 20837543 | Brain                                   | HG-U133A 2       |
| GSE19420    | Type II diabetes mellitus  | 12 | 12  | 22802091 | Skeletal muscle vastus lateralis        | HG-U133 Plus 2.0 |
| GSE39825    | Type II diabetes mellitus  | 6  | 4   | 23919306 | Fibroblasts (cell culture)              | HG_U95Av2        |
| GSE26887    | Type II diabetes mellitus  | 5  | 7   | 22427379 | Left ventricle                          | HuGene-10st      |
| GSE21340    | Type II diabetes mellitus  | 15 | 5   | 23919306 | Skeletal muscle                         | HG_U95Av2        |
| GSE38642    | Type II diabetes mellitus  | 54 | 9   | 22768844 | Pancreatic islets                       | HuGene-10st      |
| GSE24739_G0 | Chronic Myeloid Leukemia   | 4  | 8   | 21436996 | Peripheral blood                        | HG-U133 Plus 2.0 |
| GSE24739_G1 | Chronic Myeloid Leukemia   | 4  | 8   | 21436996 | Peripheral blood                        | HG-U133 Plus 2.0 |
| GSE33075    | Chronic Myeloid Leukemia   | 18 | 9   | 22388797 | Bone marrow                             | HG-U133 Plus 2.0 |
| GSE24739    | Chronic Myeloid Leukemia   | 8  | 16  | 21436996 | Peripheral blood and bone marrow        | HG-U133 Plus 2.0 |
| GSE1418     | Chronic Myeloid Leukemia   | 6  | 8   | 15618956 | Bone marrow                             | HG-Focus         |
| GSE7305     | Endometrial cancer         | 10 | 10  | 17640886 | Endometrium/Ovarian tissue              | HG-U133 Plus 2.0 |
| GSE63678    | Endometrial cancer         | 5  | 7   | 26559525 | Endometrium                             | HG-U133A         |
| GSE7803     | Endometrial cancer         | 10 | 31  | 17974957 | Cervix and squamous cervical epithelium | HG-U133A         |
| GSE17025    | Endometrial cancer         | 12 | 91  | 21619611 | Endometrium                             | HG-U133 Plus 2.0 |
| GSE36389    | Endometrial cancer         | 7  | 13  | NA       | Endometrium                             | HG-U133A         |

\* Leukemic stem cells (LSC), hematopoietic stem cells (HSCs), and AML bulk cells (CD34+CD38+, CD34-CD38+ and CD34-CD38)

Table S2: 11 knock-out benchmark data sets used to compare 8 methods in this paper.

| <b>GEO ID</b> | <b>KO gene</b> | <b>#Impacted Pathways</b> | <b>#Normal</b> | <b>#Condition</b> | <b>Pubmed ID</b> | <b>Tissue</b>                                      | <b>Platform</b> |
|---------------|----------------|---------------------------|----------------|-------------------|------------------|----------------------------------------------------|-----------------|
| GSE22873      | Myd88          | 19                        | 11             | 8                 | 22075646         | Liver                                              | Mouse430_2      |
| GSE6030       | Neurod1        | 1                         | 3              | 3                 | 17630985         | Pineal gland                                       | Mouse430_2      |
| GSE29048      | Pdx1           | 3                         | 4              | 4                 | 22135308         | Intestinal epithelium                              | Mouse430_2      |
| GSE70302      | IL1a           | 20                        | 4              | 4                 | 26224856         | Spinal cord                                        | MoGene-1.0-st   |
| GSE70302      | IL1b           | 34                        | 4              | 4                 | 26224856         | Spinal cord                                        | MoGene-1.0-st   |
| GSE58120      | IL2            | 3                         | 6              | 6                 | 25652593         | Myeloid dendritic cells                            | MoGene-1.0-st   |
| GSE46211      | TGFBR2         | 20                        | 12             | 6                 | 24496627         | Anterior palatal tissue & posterior palatal tissue | Mouse430_2      |
| GSE49166      | BHLHE40        | 1                         | 3              | 3                 | 24699451         | CD4 T cells                                        | MoGene-1.0-st   |
| GSE50933      | ID3            | 2                         | 5              | 5                 | 24244015         | Natural killer T cells                             | Mouse430_2      |
| GSE62999      | DUSP5          | 1                         | 10             | 10                | 25398911         | Bone marrow                                        | Mouse430_2      |
| GSE57917      | ONECUR1        | 2                         | 3              | 3                 | 25313862         | Retinas                                            | Mouse430_2      |

## 2 Problems with Classical Selection of DE Genes

Setting thresholds based on their p-values and unsigned log-fold changes is a widely used method to obtain a list of DE genes. However, the numbers of DE genes obtained from different studies of the same condition often differ significantly due to the heterogeneity present in the individual experiments. For example, with the thresholds of 1.5 for unsigned log-fold changes and 5% for the corrected p-values, 21 out of 75 human gene expression data sets studied do not have any DE gene, whereas one data set has more than one thousand DE genes (Fig. S1). A similar problem occurs with the 11 KO data sets, 5 of which do not have any DE gene according to these criteria (Fig. S2).

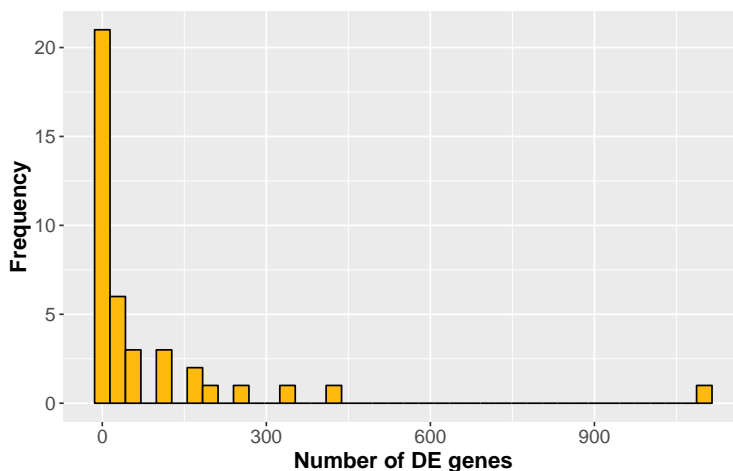

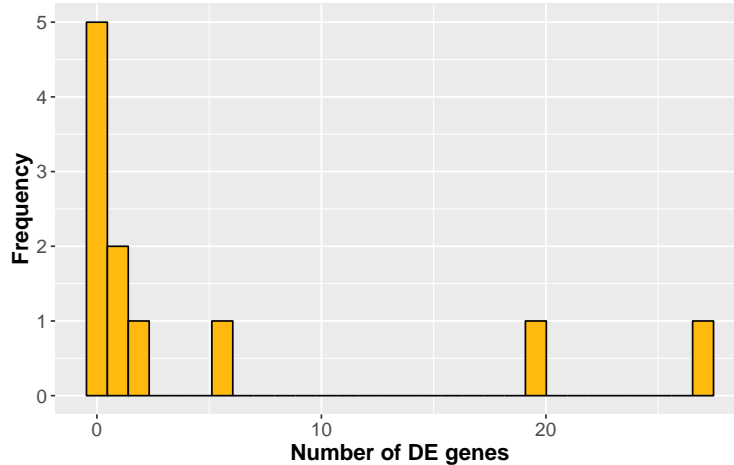

Fig. S2: **Distribution of number of DE genes of 11 mouse gene expression data sets using corrected p-value threshold of 0.05 and unsigned log-fold change threshold of 1.5**  
Five of them do not have any DE genes.

## 4 Empirical null distributions

Pathway analysis methods work under an assumption that empirical null distributions of p-values of all pathways are uniformly distributed under the true null hypothesis. However, this does not hold true in most of the cases. Fig. S4 and Fig. S5 show some examples of pathways that have empirical null distribution of p-values as reported by various methods, biased toward 0 and 1, respectively.

GSEA is the only method in this study that is unbiased for all the pathways. Fig. S6 shows that the aggregate p-values of all pathways generated by GSEA are uniformly distributed.

## 5 Number of methods biased for each pathway

While benchmarking pathway analysis methods, it is important to choose appropriate data sets. In a fair comparison, the target pathways related to the disease or condition of these data sets should have unbiased null distributions of p-value produced by all methods studied. If the null-distribution of p-values of a target pathway is not available, knowing the probability of that pathway being biased toward 0 or 1 is also helpful. In an attempt to provide this information, for each pathway we report the number of methods (out of the 11 methods investigated) biased toward 0 or 1 (Table S3).

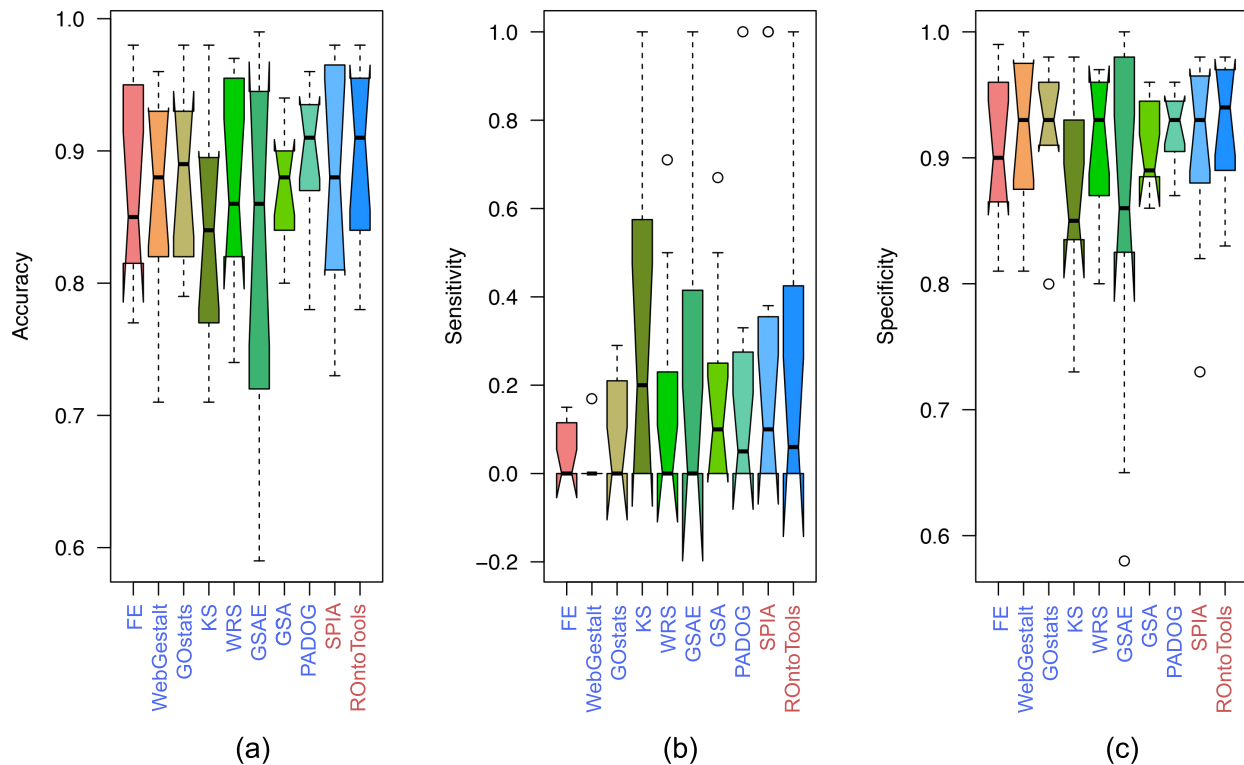

Fig. S3: **Comparison of 8 methods using 11 KO data sets in term of accuracy (a), sensitivity (b), and specificity (c).** In term of accuracy, ROntoTools and PADOG have the highest median value (0.91). ROntoTools also has the highest median value of specificity (0.94). The best method in term of sensitivity is KS which has the median value of sensitivity of 0.2. However, KS also has the lowest median specificity.

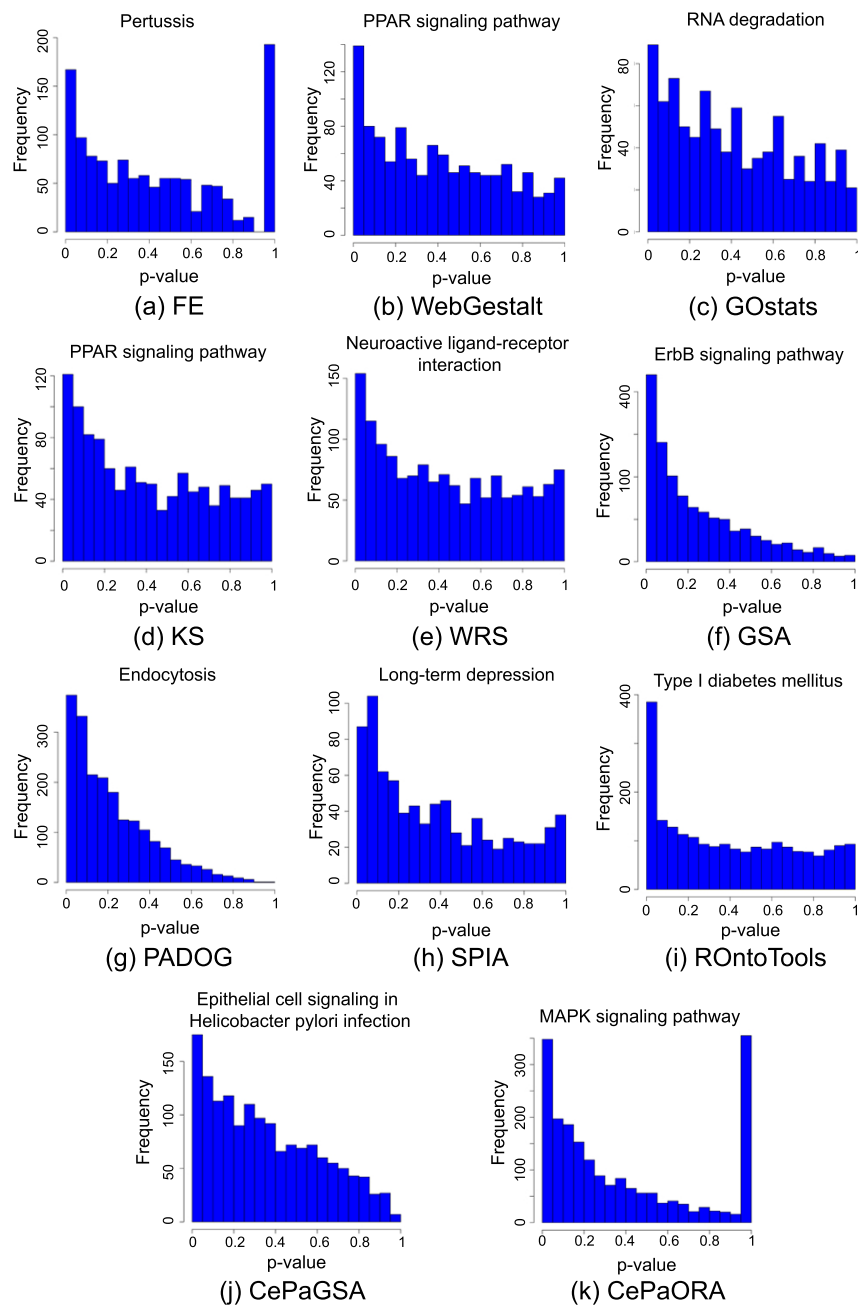

Fig. S4: **Examples of pathways that have empirical null distributions of p-value biased toward 0.** The procedure for generating null distributions is described in Fig. 5. The x-axes display the p-values whereas the y-axes display the frequencies. These pathways are likely to be falsely identified as significantly impacted by the corresponding method (false positive).



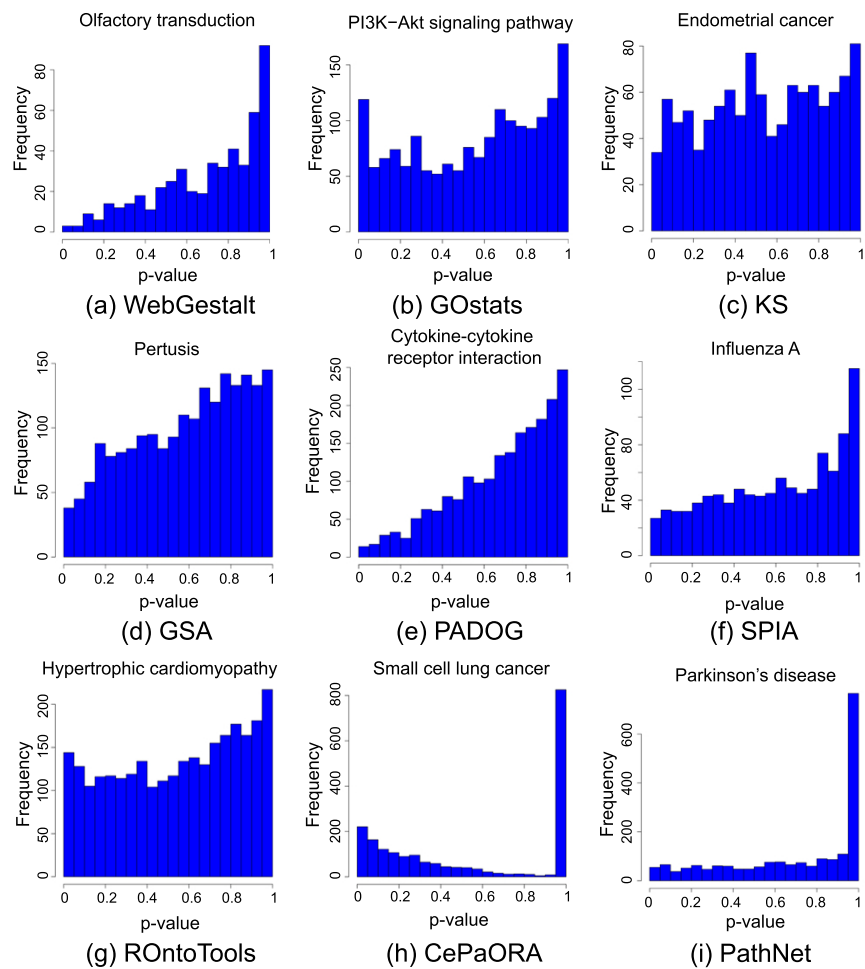

Fig. S5: **Examples of pathways that have empirical null distributions of p-value biased toward 1.** In these sub-figures, x-axes represent the p-value, while y-axes represent their frequencies. These pathways are often incorrectly excluded in the list of significant pathways by the corresponding method even when they are indeed impacted (false negative).

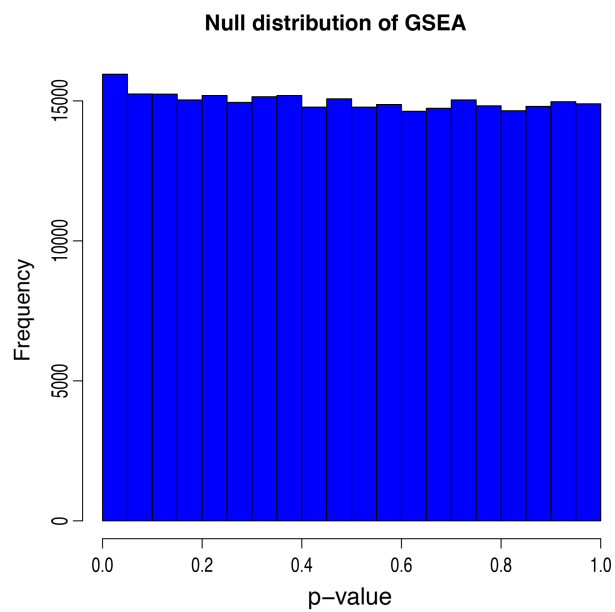

Fig. S6: **Aggregate p-values of all the pathways generated by GSEA are uniformly distributed under the null.** The uniform distribution proves that GSEA is extremely unbiased.

Table S3: Number of methods biased for each pathway

| Pathway ID | Pathway Names                                              | Bias toward 0 | Bias toward 1 | Total |
|------------|------------------------------------------------------------|---------------|---------------|-------|
| hsa04390   | Hippo signaling pathway                                    | 3             | 0             | 3     |
| hsa04066   | HIF-1 signaling pathway                                    | 3             | 0             | 3     |
| hsa04530   | Tight junction                                             | 3             | 1             | 4     |
| hsa05166   | HTLV-I infection                                           | 5             | 0             | 5     |
| hsa04670   | Leukocyte transendothelial migration                       | 5             | 0             | 5     |
| hsa05142   | Chagas disease (American trypanosomiasis)                  | 4             | 1             | 5     |
| hsa04514   | Cell adhesion molecules (CAMs)                             | 4             | 1             | 5     |
| hsa04310   | Wnt signaling pathway                                      | 4             | 1             | 5     |
| hsa04151   | PI3K-Akt signaling pathway                                 | 4             | 1             | 5     |
| hsa05034   | Alcoholism                                                 | 2             | 3             | 5     |
| hsa05169   | Epstein-Barr virus infection                               | 6             | 0             | 6     |
| hsa05215   | Prostate cancer                                            | 5             | 1             | 6     |
| hsa05212   | Pancreatic cancer                                          | 5             | 1             | 6     |
| hsa05202   | Transcriptional misregulation in cancer                    | 5             | 1             | 6     |
| hsa05161   | Hepatitis B                                                | 5             | 1             | 6     |
| hsa05030   | Cocaine addiction                                          | 5             | 1             | 6     |
| hsa04810   | Regulation of actin cytoskeleton                           | 5             | 1             | 6     |
| hsa04726   | Serotonergic synapse                                       | 5             | 1             | 6     |
| hsa04713   | Circadian entrainment                                      | 5             | 1             | 6     |
| hsa04540   | Gap junction                                               | 5             | 1             | 6     |
| hsa04370   | VEGF signaling pathway                                     | 5             | 1             | 6     |
| hsa04270   | Vascular smooth muscle contraction                         | 5             | 1             | 6     |
| hsa04064   | NF-kappa B signaling pathway                               | 5             | 1             | 6     |
| hsa05203   | Viral carcinogenesis                                       | 4             | 2             | 6     |
| hsa05164   | Influenza A                                                | 4             | 2             | 6     |
| hsa05162   | Measles 4                                                  | 2             | 6             | 6     |
| hsa05152   | Tuberculosis                                               | 4             | 2             | 6     |
| hsa05120   | Epithelial cell signaling in Helicobacter pylori infection | 4             | 2             | 6     |
| hsa04916   | Melanogenesis                                              | 4             | 2             | 6     |
| hsa04727   | GABAergic synapse                                          | 4             | 2             | 6     |
| hsa04723   | Retrograde endocannabinoid signaling                       | 4             | 2             | 6     |
| hsa04330   | Notch signaling pathway                                    | 4             | 2             | 6     |
| hsa04210   | Apoptosis                                                  | 4             | 2             | 6     |
| hsa03460   | Fanconi anemia pathway                                     | 4             | 2             | 6     |
| hsa04920   | Adipocytokine signaling pathway                            | 3             | 3             | 6     |
| hsa04144   | Endocytosis                                                | 3             | 3             | 6     |
| hsa04914   | Progesterone-mediated oocyte maturation                    | 7             | 0             | 7     |
| hsa05214   | Glioma                                                     | 6             | 1             | 7     |
| hsa05168   | Herpes simplex infection                                   | 6             | 1             | 7     |
| hsa04725   | Cholinergic synapse                                        | 6             | 1             | 7     |
| hsa04724   | Glutamatergic synapse                                      | 6             | 1             | 7     |
| hsa04721   | Synaptic vesicle cycle                                     | 6             | 1             | 7     |
| hsa04664   | Fc epsilon RI signaling pathway                            | 6             | 1             | 7     |
| hsa04380   | Osteoclast differentiation                                 | 6             | 1             | 7     |
| hsa04360   | Axon guidance                                              | 6             | 1             | 7     |
| hsa05323   | Rheumatoid arthritis                                       | 5             | 2             | 7     |
| hsa05218   | Melanoma                                                   | 5             | 2             | 7     |
| hsa05210   | Colorectal cancer                                          | 5             | 2             | 7     |
| hsa05132   | Salmonella infection                                       | 5             | 2             | 7     |
| hsa04340   | Hedgehog signaling pathway                                 | 5             | 2             | 7     |
| hsa04010   | MAPK signaling pathway                                     | 5             | 2             | 7     |
| hsa03008   | Ribosome biogenesis in eukaryotes                          | 5             | 2             | 7     |
| hsa05032   | Morphine addiction                                         | 4             | 3             | 7     |
| hsa04620   | Toll-like receptor signaling pathway                       | 4             | 3             | 7     |
| hsa05016   | Huntington's disease                                       | 3             | 4             | 7     |
| hsa04650   | Natural killer cell mediated cytotoxicity                  | 3             | 4             | 7     |

|          |                                                           |   |   |    |
|----------|-----------------------------------------------------------|---|---|----|
| hsa04961 | Endocrine and other factor-regulated calcium reabsorption | 8 | 0 | 8  |
| hsa05222 | Small cell lung cancer                                    | 7 | 1 | 8  |
| hsa05145 | Toxoplasmosis                                             | 7 | 1 | 8  |
| hsa05031 | Amphetamine addiction                                     | 7 | 1 | 8  |
| hsa04912 | GnRH signaling pathway                                    | 7 | 1 | 8  |
| hsa04666 | Fc gamma R-mediated phagocytosis                          | 7 | 1 | 8  |
| hsa04662 | B cell receptor signaling pathway                         | 7 | 1 | 8  |
| hsa04350 | TGF-beta signaling pathway                                | 7 | 1 | 8  |
| hsa05200 | Pathways in cancer                                        | 6 | 2 | 8  |
| hsa05160 | Hepatitis C                                               | 6 | 2 | 8  |
| hsa04520 | Adherens junction                                         | 6 | 2 | 8  |
| hsa05217 | Basal cell carcinoma                                      | 5 | 3 | 8  |
| hsa05134 | Legionellosis                                             | 5 | 3 | 8  |
| hsa05133 | Pertussis                                                 | 5 | 3 | 8  |
| hsa05010 | Alzheimer's disease                                       | 5 | 3 | 8  |
| hsa04973 | Carbohydrate digestion and absorption                     | 5 | 3 | 8  |
| hsa04145 | Phagosome                                                 | 5 | 3 | 8  |
| hsa04020 | Calcium signaling pathway                                 | 5 | 3 | 8  |
| hsa05322 | Systemic lupus erythematosus                              | 4 | 4 | 8  |
| hsa04622 | RIG-I-like receptor signaling pathway                     | 4 | 4 | 8  |
| hsa04142 | Lysosome                                                  | 4 | 4 | 8  |
| hsa05100 | Bacterial invasion of epithelial cells                    | 8 | 1 | 9  |
| hsa04710 | Circadian rhythm                                          | 8 | 1 | 9  |
| hsa04130 | SNARE interactions in vesicular transport                 | 8 | 1 | 9  |
| hsa04012 | ErbB signaling pathway                                    | 8 | 1 | 9  |
| hsa03015 | mRNA surveillance pathway                                 | 8 | 1 | 9  |
| hsa05412 | Arrhythmogenic right ventricular cardiomyopathy (ARVC)    | 7 | 2 | 9  |
| hsa05223 | Non-small cell lung cancer                                | 7 | 2 | 9  |
| hsa05220 | Chronic myeloid leukemia                                  | 7 | 2 | 9  |
| hsa05211 | Renal cell carcinoma                                      | 7 | 2 | 9  |
| hsa05130 | Pathogenic Escherichia coli infection                     | 7 | 2 | 9  |
| hsa04971 | Gastric acid secretion                                    | 7 | 2 | 9  |
| hsa04960 | Aldosterone-regulated sodium reabsorption                 | 7 | 2 | 9  |
| hsa04910 | Insulin signaling pathway                                 | 7 | 2 | 9  |
| hsa04730 | Long-term depression                                      | 7 | 2 | 9  |
| hsa04728 | Dopaminergic synapse                                      | 7 | 2 | 9  |
| hsa04720 | Long-term potentiation                                    | 7 | 2 | 9  |
| hsa04150 | mTOR signaling pathway                                    | 7 | 2 | 9  |
| hsa04114 | Oocyte meiosis                                            | 7 | 2 | 9  |
| hsa04110 | Cell cycle                                                | 7 | 2 | 9  |
| hsa05416 | Viral myocarditis                                         | 6 | 3 | 9  |
| hsa05332 | Graft-versus-host disease                                 | 6 | 3 | 9  |
| hsa05221 | Acute myeloid leukemia                                    | 6 | 3 | 9  |
| hsa05219 | Bladder cancer                                            | 6 | 3 | 9  |
| hsa05216 | Thyroid cancer                                            | 6 | 3 | 9  |
| hsa05146 | Amoebiasis                                                | 6 | 3 | 9  |
| hsa05143 | African trypanosomiasis                                   | 6 | 3 | 9  |
| hsa05014 | Amyotrophic lateral sclerosis (ALS)                       | 6 | 3 | 9  |
| hsa04978 | Mineral absorption                                        | 6 | 3 | 9  |
| hsa04940 | Type I diabetes mellitus                                  | 6 | 3 | 9  |
| hsa04621 | NOD-like receptor signaling pathway                       | 6 | 3 | 9  |
| hsa05410 | Hypertrophic cardiomyopathy (HCM)                         | 5 | 4 | 9  |
| hsa05140 | Leishmaniasis                                             | 5 | 4 | 9  |
| hsa05012 | Parkinson's disease                                       | 5 | 4 | 9  |
| hsa04970 | Salivary secretion                                        | 5 | 4 | 9  |
| hsa04742 | Taste transduction                                        | 5 | 4 | 9  |
| hsa04630 | Jak-STAT signaling pathway                                | 4 | 5 | 9  |
| hsa05131 | Shigellosis                                               | 8 | 2 | 10 |
| hsa04722 | Neurotrophin signaling pathway                            | 8 | 2 | 10 |

|          |                                              |   |   |    |
|----------|----------------------------------------------|---|---|----|
| hsa04660 | T cell receptor signaling pathway            | 8 | 2 | 10 |
| hsa04512 | ECM-receptor interaction                     | 8 | 2 | 10 |
| hsa04115 | p53 signaling pathway                        | 8 | 2 | 10 |
| hsa05213 | Endometrial cancer                           | 7 | 3 | 10 |
| hsa04950 | Maturity onset diabetes of the young         | 7 | 3 | 10 |
| hsa04122 | Sulfur relay system                          | 7 | 3 | 10 |
| hsa05310 | Asthma                                       | 6 | 4 | 10 |
| hsa04976 | Bile secretion                               | 6 | 4 | 10 |
| hsa04972 | Pancreatic secretion                         | 6 | 4 | 10 |
| hsa04612 | Antigen processing and presentation          | 6 | 4 | 10 |
| hsa04062 | Chemokine signaling pathway                  | 6 | 4 | 10 |
| hsa04060 | Cytokine-cytokine receptor interaction       | 6 | 4 | 10 |
| hsa05414 | Dilated cardiomyopathy                       | 5 | 5 | 10 |
| hsa04740 | Olfactory transduction                       | 5 | 5 | 10 |
| hsa04140 | Regulation of autophagy                      | 5 | 5 | 10 |
| hsa04962 | Vasopressin-regulated water reabsorption     | 9 | 2 | 11 |
| hsa04930 | Type II diabetes mellitus                    | 9 | 2 | 11 |
| hsa04510 | Focal adhesion                               | 9 | 2 | 11 |
| hsa05150 | Staphylococcus aureus infection              | 8 | 3 | 11 |
| hsa04320 | Dorso-ventral axis formation                 | 8 | 3 | 11 |
| hsa04141 | Protein processing in endoplasmic reticulum  | 8 | 3 | 11 |
| hsa03018 | RNA degradation                              | 8 | 3 | 11 |
| hsa03013 | RNA transport                                | 8 | 3 | 11 |
| hsa05330 | Allograft rejection                          | 7 | 4 | 11 |
| hsa05110 | Vibrio cholerae infection                    | 7 | 4 | 11 |
| hsa04744 | Phototransduction                            | 7 | 4 | 11 |
| hsa04672 | Intestinal immune network for IgA production | 7 | 4 | 11 |
| hsa04610 | Complement and coagulation cascades          | 7 | 4 | 11 |
| hsa04260 | Cardiac muscle contraction                   | 7 | 4 | 11 |
| hsa05020 | Prion diseases                               | 6 | 5 | 11 |
| hsa03320 | PPAR signaling pathway                       | 6 | 5 | 11 |
| hsa04080 | Neuroactive ligand-receptor interaction      | 4 | 7 | 11 |
| hsa05320 | Autoimmune thyroid disease                   | 7 | 5 | 12 |
| hsa05144 | Malaria                                      | 7 | 5 | 12 |
| hsa04623 | Cytosolic DNA-sensing pathway                | 7 | 5 | 12 |

## References

- [1] MAQC Consortium: The MicroArray Quality Control (MAQC) project shows inter- and intraplatform reproducibility of gene expression measurements. *Nature Biotechnology* **24**(9), 1151–1161 (2006)
- [2] Chen, J.J., Hsueh, H.-M., Delongchamp, R.R., Lin, C.-J., Tsai, C.-A.: Reproducibility of microarray data: a further analysis of microarray quality control (MAQC) data. *BMC Bioinformatics* **8**(1), 412 (2007)
